# Supplementary material for: AtFusionDB: a database of fusion transcripts in Arabidopsis thaliana
Source: Database (Oxford). 2019 Jan 8;2019:bay135. doi: 10.1093/database/bay135 (PMC6323297; doi:10.1093/database/bay135)
Supplement: Supplementary Data [file bay135_supp.xlsx]

## Sheet: Table 1.1
Table 1.1: Genes in AtFusionDB showing homology with genes in the study of Zhang et al (2010).					Methodology
AtFusionDB	Rice (Identifier conversion) for Zhang et al (2010) study.				In order to compare our study with the chimeric transcripts reported in rice by Zhang and his team in 2010, we retrieved the accession numbers of genes associated with the generation of fusion transcripts in rice from the supplementary material available online. Their corresponding gene ID(s) and cDNA sequences were fetched from Ensembl (https://plants.ensembl.org). Similarly, transcript sequence…
Ensembl ID	Ensembl ID	Gene ID	Transcript ID
AT1G08360	AK061522	Os08g0558000	Os08t0558000
AT1G08360	AK071249	Os08g0558800	Os08t0558800
AT1G13440	AK099086	Os02g0601300	Os02t0601300
AT1G20010	AK122127	Os01g0282800	Os01t0282800
AT1G43170	AK073392	Os11g0168200	Os11t0168200
AT1G50010	AK102194	Os03g0726100	Os03t0726100
AT1G54270	AK119234	Os06g0701100	Os06t0701100
AT2G34480	AK102673	Os05g0565000	Os05t0565000
AT2G34480	AK121755	Os01g0752300	Os01t0752300
AT2G47610	AK121204	Os08g0326400	Os08t0326400
AT3G04120	AK099086	Os02g0601300	Os02t0601300
AT3G11510	AK101459	Os04g0413600	Os04t0413600
AT3G14600	AK121755	Os01g0752300	Os01t0752300
AT3G62870	AK121204	Os08g0326400	Os08t0326400
AT3G62870	AK121204	Os09g0507800	Os09t0507800
AT4G02890	AK101547	Os02g0161900	Os02t0161900
AT4G02890	AK121590	Os06g0681400	Os06t0681400
AT4G05050	AK101547	Os02g0161900	Os02t0161900
AT4G05050	AK121590	Os06g0681400	Os06t0681400
AT4G05320	AK101547	Os02g0161900	Os02t0161900
AT4G05320	AK121590	Os06g0681400	Os06t0681400
AT4G14960	AK102194	Os03g0726100	Os03t0726100
AT5G03240	AK101547	Os02g0161900	Os02t0161900
AT5G10360	AK121621	Os03g0390000	Os03t0390000
AT5G17330	AK071556	Os03g0236200	Os03t0236200
AT5G20620	AK101547	Os02g0161900	Os02t0161900
AT5G23860	AK069237	Os06g0671900	Os06t0671900
AT5G44340	AK069237	Os06g0671900	Os06t0671900
AT5G58420	AK061826	Os01g0358400	Os01t0358400
AT5G58420	AK102423	Os02g0105900	Os02t0105900
AT5G62690	AK122127	Os01g0282800	Os01t0282800
AT5G62700	AK122127	Os01g0282800	Os01t0282800
BLAST Result: Query from Rice transcripts (Zhang et al, 2010) and subject from Arabidopsis thaliana transcripts from AtFusionDB (Variants included).
query acc.ver	subject acc.ver	% identity	alignment length	mismatches	gap opens	q. start	q. end	s. start	s. end	evalue	bit score	query coverage
Os03t0236200-01	AT5G17330.1	76.674	1329	300	9	196	1519	231	1554	0	728	66
Os08t0326400-01	AT2G47610.1	77.927	743	153	9	129	864	142	880	1.99e-126	453	68
Os08t0326400-01	AT3G62870.1	77.943	739	159	4	132	868	158	894	4.29e-128	459	68
Os01t0282800-02	AT1G20010.1	78.336	1334	281	7	96	1422	352	1684	0	856	75
Os06t0671900-01	AT5G23860.1	79.41	1321	265	7	93	1408	110	1428	0	926	73
Os06t0671900-01	AT5G23860.2	79.41	1321	265	7	93	1408	87	1405	0	926	73
Os09t0507800-01	AT3G62870.1	79.595	740	145	6	118	854	158	894	4.03e-148	525	70
Os06t0671900-01	AT5G44340.1	80.105	1332	256	6	93	1418	157	1485	0	983	74
Os06t0701100-02	AT1G54270.1	80.534	1161	220	6	225	1382	499	1656	0	887	66
Os06t0701100-03	AT1G54270.1	80.534	1161	220	6	48	1205	499	1656	0	887	77
Os01t0282800-02	AT5G62700.1	80.974	1314	248	2	96	1408	244	1556	0	1040	74
Os06t0681400-01	AT4G02890.2	81.236	453	83	2	1210	1661	71	522	1.76e-99	364	80
Os01t0282800-02	AT5G62690.1	81.279	1314	244	2	96	1408	265	1577	0	1062	74
Os06t0681400-01	AT4G05050.3	81.331	691	122	7	522	1209	37	723	9.75e-157	555	57
Os02t0161900-01	AT4G05320.5	81.361	676	122	4	82	755	314	987	1.35e-154	547	84
Os06t0681400-01	AT4G05050.1	81.368	687	122	6	526	1209	144	827	9.75e-157	555	57
Os06t0681400-01	AT4G05050.2	81.368	687	122	6	526	1209	381	1064	9.75e-157	555	57
Os02t0161900-01	AT4G02890.1	81.498	227	42	0	82	308	524	750	3.39e-46	187	84
Os02t0161900-01	AT4G02890.2	81.498	227	42	0	82	308	527	753	3.39e-46	187	84
Os02t0161900-01	AT4G02890.3	81.498	227	42	0	82	308	1049	1275	3.39e-46	187	83
Os02t0161900-01	AT4G02890.4	81.498	227	42	0	82	308	890	1116	3.39e-46	187	84
Os06t0681400-01	AT4G02890.3	81.498	681	124	2	982	1661	365	1044	7.54e-158	558	80
Os06t0681400-01	AT4G02890.4	81.498	681	124	2	982	1661	206	885	7.54e-158	558	80
Os02t0161900-01	AT4G05320.1	81.509	676	121	4	82	755	542	1215	2.9e-156	553	84
Os02t0161900-01	AT4G05050.1	81.579	684	126	0	538	1221	144	827	3.73e-160	566	56
Os02t0161900-01	AT4G05050.2	81.579	684	126	0	538	1221	381	1064	3.73e-160	566	56
Os02t0161900-01	AT4G05050.3	81.579	684	126	0	538	1221	40	723	3.73e-160	566	56
Os02t0161900-01	AT4G05320.2	81.657	676	120	4	82	755	963	1636	6.23e-158	558	84
Os02t0161900-01	AT4G05320.3	81.657	676	120	4	82	755	745	1418	6.23e-158	558	83
Os02t0161900-01	AT4G05320.4	81.657	676	120	4	82	755	735	1408	6.23e-158	558	83
Os02t0161900-01	AT4G05320.6	81.657	676	120	4	82	755	732	1405	6.23e-158	558	70
Os03t0390000-02	AT5G10360.1	81.678	715	121	9	39	748	113	822	1.75e-166	586	70
Os02t0161900-01	AT5G20620.1	81.715	1143	201	8	310	1448	115	1253	0	946	69
Os02t0161900-01	AT5G03240.1	81.729	914	161	6	538	1448	243	1153	0	758	69
Os02t0161900-01	AT5G03240.2	81.729	914	161	6	538	1448	400	1310	0	758	69
Os02t0161900-01	AT5G03240.3	81.729	914	161	6	538	1448	418	1328	0	758	69
Os06t0681400-01	AT4G02890.2	81.778	686	121	4	526	1209	71	754	9.68e-162	571	80
Os02t0161900-01	AT4G05320.3	81.81	1138	203	4	314	1449	65	1200	0	952	83
Os02t0601300-01	AT1G13440.1	81.873	993	180	0	241	1233	397	1389	0	837	68
Os02t0161900-01	AT4G05320.2	81.874	1142	203	4	310	1449	279	1418	0	959	84
Os02t0161900-01	AT4G05320.4	81.874	1142	203	4	310	1449	51	1190	0	959	83
Os06t0681400-01	AT4G02890.1	81.898	453	80	2	1210	1661	68	519	1.75e-104	381	80
Os02t0161900-01	AT4G05320.5	81.937	919	162	4	77	993	81	997	0	774	84
Os06t0681400-01	AT4G02890.3	81.947	914	161	4	298	1209	365	1276	0	771	80
Os06t0681400-01	AT4G02890.4	81.947	914	161	4	298	1209	206	1117	0	771	80
Os02t0161900-01	AT4G05320.2	81.961	1142	202	4	82	1221	507	1646	0	965	84
Os02t0161900-01	AT4G05320.3	81.961	1142	202	4	82	1221	289	1428	0	965	83
Os02t0161900-01	AT4G05320.4	81.961	1142	202	4	82	1221	279	1418	0	965	83
Os11t0168200-01	AT1G43170.4	81.974	932	158	9	294	1220	66	992	0	782	63
Os11t0168200-02	AT1G43170.4	81.974	932	158	9	255	1181	66	992	0	782	65
Os02t0161900-01	AT4G05320.1	82.018	456	80	2	82	536	770	1224	3.11e-106	387	84
Os02t0161900-01	AT4G05320.2	82.018	456	80	2	82	536	1191	1645	3.11e-106	387	84
Os02t0161900-01	AT4G05320.3	82.018	456	80	2	82	536	973	1427	3.11e-106	387	83
Os02t0161900-01	AT4G05320.4	82.018	456	80	2	82	536	963	1417	3.11e-106	387	83
Os02t0161900-01	AT4G05320.5	82.018	456	80	2	82	536	542	996	3.11e-106	387	84
Os02t0161900-01	AT4G05320.6	82.018	456	80	2	82	536	960	1414	3.11e-106	387	70
Os02t0161900-01	AT4G05320.8	82.018	456	80	2	82	536	525	979	3.11e-106	387	69
Os02t0161900-01	AT4G05320.6	82.04	1147	202	4	77	1221	271	1415	0	974	70
Os02t0161900-01	AT4G05320.8	82.047	674	121	0	82	755	297	970	6.19e-163	575	69
Os02t0161900-01	AT4G02890.3	82.19	685	120	2	766	1449	365	1048	7.95e-167	588	83
Os02t0161900-01	AT4G02890.4	82.19	685	120	2	766	1449	206	889	7.95e-167	588	84
Os06t0681400-01	AT4G02890.1	82.19	685	120	2	526	1209	68	751	9.62e-167	588	80
Os02t0161900-01	AT4G05320.5	82.216	686	118	4	766	1449	86	769	7.95e-167	588	84
Os01t0358400-01	AT5G58420.1	82.299	757	132	2	84	839	137	892	0	654	73
Os03t0726100-02	AT4G14960.2	82.304	1085	190	2	1	1084	406	1489	0	939	79
Os06t0681400-01	AT4G02890.1	82.327	447	79	0	70	516	296	742	1.05e-106	388	80
Os06t0681400-01	AT4G02890.2	82.327	447	79	0	70	516	299	745	1.05e-106	388	80
Os06t0681400-01	AT4G02890.3	82.327	447	79	0	70	516	821	1267	1.05e-106	388	80
Os06t0681400-01	AT4G02890.4	82.327	447	79	0	70	516	662	1108	1.05e-106	388	80
Os02t0161900-01	AT4G02890.3	82.334	917	156	6	80	993	363	1276	0	791	83
Os02t0161900-01	AT4G02890.4	82.391	920	156	6	77	993	201	1117	0	797	84
Os01t0752300-01	AT2G34480.1	82.396	551	89	7	106	651	66	613	1.27e-132	473	60
Os01t0752300-01	AT2G34480.2	82.396	551	89	7	106	651	236	783	1.27e-132	473	60
Os02t0161900-01	AT4G05320.8	82.475	913	158	2	310	1221	69	980	0	798	69
Os02t0161900-01	AT5G20620.2	82.495	914	154	6	538	1448	162	1072	0	797	56
Os02t0601300-01	AT3G04120.1	82.53	996	168	5	241	1233	148	1140	0	870	68
Os02t0161900-01	AT4G05320.3	82.551	1364	238	0	86	1449	65	1428	0	1201	83
Os02t0161900-01	AT4G02890.3	82.556	665	113	3	82	745	593	1255	3.7e-165	582	83
Os02t0161900-01	AT4G02890.4	82.556	665	113	3	82	745	434	1096	3.7e-165	582	84
Os01t0752300-01	AT3G14600.1	82.609	529	89	3	106	633	135	661	7.64e-130	464	58
Os02t0161900-01	AT4G05320.4	82.628	1370	238	0	80	1449	49	1418	0	1212	83
Os02t0161900-01	AT4G05320.7	82.646	461	78	2	77	536	81	540	2.39e-112	407	69
Os02t0161900-01	AT4G05320.1	82.647	1141	196	2	310	1449	86	1225	0	1009	84
Os02t0161900-01	AT4G05320.2	82.666	1373	238	0	77	1449	274	1646	0	1218	84
Os06t0681400-01	AT4G05050.1	82.688	439	69	6	70	505	372	806	4.87e-105	383	57
Os06t0681400-01	AT4G05050.2	82.688	439	69	6	70	505	609	1043	4.87e-105	383	57
Os06t0681400-01	AT4G05050.3	82.688	439	69	6	70	505	268	702	4.87e-105	383	57
Os02t0161900-01	AT4G02890.2	82.703	688	111	8	310	993	71	754	7.9e-172	604	84
Os03t0726100-02	AT4G14960.1	82.717	920	157	2	1	919	341	1259	0	817	67
Os02t0105900-01	AT5G58420.1	82.718	758	129	2	92	848	137	893	0	673	75
Os02t0161900-01	AT5G03240.1	82.819	227	39	0	82	308	927	1153	3.37e-51	204	69
Os02t0161900-01	AT5G03240.2	82.819	227	39	0	82	308	1084	1310	3.37e-51	204	69
Os02t0161900-01	AT5G03240.3	82.819	227	39	0	82	308	1102	1328	3.37e-51	204	69
Os02t0161900-01	AT4G05320.3	82.87	683	114	3	769	1449	63	744	1.7e-173	610	83
Os02t0161900-01	AT4G02890.1	82.895	456	78	0	994	1449	68	523	1.85e-113	411	84
Os05t0565000-01	AT2G34480.1	82.9	538	90	2	63	599	77	613	2.24e-135	483	56
Os05t0565000-01	AT2G34480.2	82.9	538	90	2	63	599	247	783	2.24e-135	483	56
Os02t0161900-01	AT4G05320.1	82.912	1147	192	4	77	1221	81	1225	0	1029	84
Os02t0161900-01	AT4G02890.3	82.913	913	154	2	310	1221	365	1276	0	821	83
Os02t0161900-01	AT4G02890.4	82.913	913	154	2	310	1221	206	1117	0	821	84
Os02t0161900-01	AT4G05320.1	82.92	685	115	2	766	1449	86	769	3.65e-175	616	84
Os02t0161900-01	AT4G05320.2	82.92	685	115	2	766	1449	279	962	3.65e-175	616	84
Os02t0161900-01	AT4G05320.4	82.92	685	115	2	766	1449	51	734	3.65e-175	616	83
Os02t0161900-01	AT4G05320.5	82.951	915	150	6	310	1221	86	997	0	821	84
Os08t0558000-01	AT1G08360.1	82.998	547	90	3	158	702	233	778	3.61e-138	492	58
Os03t0726100-01	AT4G14960.2	83.029	1314	221	2	126	1438	177	1489	0	1190	75
Os02t0161900-01	AT4G02890.2	83.187	684	115	0	538	1221	71	754	1.68e-178	627	84
Os04t0413600-01	AT3G11510.1	83.215	423	69	2	111	532	117	538	1.32e-106	387	60
Os02t0161900-01	AT4G05320.7	83.221	447	73	2	310	755	86	531	6.64e-113	409	69
Os02t0161900-01	AT4G02890.1	83.261	687	109	6	310	993	68	751	1.68e-178	627	84
Os02t0161900-01	AT4G02890.2	83.284	670	109	3	77	745	66	733	1.31e-174	614	84
Os02t0161900-01	AT4G05320.7	83.37	457	74	2	766	1221	86	541	8.53e-117	422	69
Os08t0558800-01	AT1G08360.1	83.394	548	86	5	151	695	233	778	1.66e-141	503	58
Os03t0726100-01	AT4G14960.1	83.464	1149	188	2	126	1273	112	1259	0	1068	66
Os02t0161900-01	AT4G02890.1	83.48	684	113	0	538	1221	68	751	0	638	84
Os02t0161900-01	AT4G02890.1	83.582	670	107	3	77	745	63	730	6.06e-178	625	84
Os02t0161900-01	AT4G02890.3	83.662	912	149	0	538	1449	365	1276	0	859	83
Os02t0161900-01	AT4G02890.4	83.662	912	149	0	538	1449	206	1117	0	859	84
Os02t0161900-01	AT4G05320.1	83.7	227	37	0	82	308	998	1224	1.55e-54	215	84
Os02t0161900-01	AT4G05320.2	83.7	227	37	0	82	308	1419	1645	1.55e-54	215	84
Os02t0161900-01	AT4G05320.3	83.7	227	37	0	82	308	1201	1427	1.55e-54	215	83
Os02t0161900-01	AT4G05320.4	83.7	227	37	0	82	308	1191	1417	1.55e-54	215	83
Os02t0161900-01	AT4G05320.5	83.7	227	37	0	82	308	770	996	1.55e-54	215	84
Os02t0161900-01	AT4G05320.6	83.7	227	37	0	82	308	1188	1414	1.55e-54	215	70
Os02t0161900-01	AT4G05320.7	83.7	227	37	0	82	308	314	540	1.55e-54	215	69
Os02t0161900-01	AT4G05320.8	83.7	227	37	0	82	308	753	979	1.55e-54	215	69
Os03t0726100-01	AT1G50010.1	83.714	1314	212	2	126	1438	152	1464	0	1240	75
Os06t0681400-01	AT4G05320.8	84.318	440	60	9	70	505	525	959	1.03e-116	422	57
Os06t0681400-01	AT4G05320.1	84.439	437	65	3	70	505	770	1204	2.22e-118	427	57
Os06t0681400-01	AT4G05320.2	84.439	437	65	3	70	505	1191	1625	2.22e-118	427	57
Os06t0681400-01	AT4G05320.3	84.439	437	65	3	70	505	973	1407	2.22e-118	427	57
Os06t0681400-01	AT4G05320.4	84.439	437	65	3	70	505	963	1397	2.22e-118	427	57
Os06t0681400-01	AT4G05320.5	84.439	437	65	3	70	505	542	976	2.22e-118	427	57
Os06t0681400-01	AT4G05320.6	84.439	437	65	3	70	505	960	1394	2.22e-118	427	57
Os02t0161900-01	AT4G02890.2	84.672	685	103	2	766	1449	71	754	0	682	84
Os02t0161900-01	AT4G05050.1	85.022	227	34	0	82	308	600	826	1.54e-59	231	56
Os02t0161900-01	AT4G05050.2	85.022	227	34	0	82	308	837	1063	1.54e-59	231	56
Os02t0161900-01	AT4G05050.3	85.022	227	34	0	82	308	496	722	1.54e-59	231	56
Os02t0161900-01	AT4G02890.1	85.234	684	101	0	766	1449	68	751	0	704	84
Os06t0681400-01	AT4G05050.1	86.058	208	28	1	70	277	600	806	1.12e-56	222	57
Os06t0681400-01	AT4G05050.2	86.058	208	28	1	70	277	837	1043	1.12e-56	222	57
Os06t0681400-01	AT4G05050.3	86.058	208	28	1	70	277	496	702	1.12e-56	222	57
Os06t0681400-01	AT4G02890.1	86.301	219	30	0	70	288	524	742	1.12e-61	239	80
Os06t0681400-01	AT4G02890.2	86.301	219	30	0	70	288	527	745	1.12e-61	239	80
Os06t0681400-01	AT4G02890.3	86.301	219	30	0	70	288	1049	1267	1.12e-61	239	80
Os06t0681400-01	AT4G02890.4	86.301	219	30	0	70	288	890	1108	1.12e-61	239	80
Os06t0681400-01	AT4G05320.1	86.538	208	27	1	70	277	998	1204	2.41e-58	228	57
Os06t0681400-01	AT4G05320.2	86.538	208	27	1	70	277	1419	1625	2.41e-58	228	57
Os06t0681400-01	AT4G05320.3	86.538	208	27	1	70	277	1201	1407	2.41e-58	228	57
Os06t0681400-01	AT4G05320.4	86.538	208	27	1	70	277	1191	1397	2.41e-58	228	57
Os06t0681400-01	AT4G05320.5	86.538	208	27	1	70	277	770	976	2.41e-58	228	57
Os06t0681400-01	AT4G05320.6	86.538	208	27	1	70	277	1188	1394	2.41e-58	228	57
Os06t0681400-01	AT4G05320.8	86.538	208	27	1	70	277	753	959	2.41e-58	228	57

## Sheet: Table 1.2
Table 1.2: Homologous fusion pairs (5’ gene _ 3’ gene) from AtFusionDB and Zhang et al (2010) rice study.
5’ gene _ 3’ gene from AtFusionDB	5’ gene _ 3’ gene from rice study
AT4G02890_AT4G05050	AK101547_AK121590
AT4G02890_AT4G05050	AK121590_AK101547
AT4G02890_AT4G05320	AK101547_AK121590
AT4G02890_AT4G05320	AK121590_AK101547
AT4G05050_AT4G02890	AK101547_AK121590
AT4G05050_AT4G02890	AK121590_AK101547
AT4G05050_AT4G05320	AK101547_AK121590
AT4G05050_AT4G05320	AK121590_AK101547
AT4G05050_AT5G03240	AK121590_AK101547
AT4G05320_AT4G02890	AK101547_AK121590
AT4G05320_AT4G02890	AK121590_AK101547
AT4G05320_AT4G05050	AK101547_AK121590
AT4G05320_AT4G05050	AK121590_AK101547
AT4G05320_AT5G03240	AK121590_AK101547
AT4G05320_AT5G20620	AK121590_AK101547
AT5G03240_AT4G02890	AK101547_AK121590
AT5G03240_AT4G05320	AK101547_AK121590
AT5G20620_AT4G02890	AK101547_AK121590

## Sheet: Table 1.3
TABLE 1.3: BLAST result: Query from tobacco transcripts and subject from Arabidopsis thaliana transcripts from AtFusionDB (variants included).
query acc.ver	subject acc.ver	% identity	alignment length	mismatches	gap opens	q. start	q. end	s. start	s. end	evalue	bit score	query coverage
XM_016585781.1	AT5G20620.1	81.099	455	86	0	1	455	799	1253	7.02e-103	364	99
XM_016585781.1	AT5G20620.2	81.099	455	86	0	1	455	618	1072	7.02e-103	364	99
XM_016580190.1	AT5G62690.1	80.736	462	89	0	2	463	703	1164	6.37e-102	361	99
XM_016585781.1	AT5G20620.1	78.769	650	138	0	1	650	571	1220	1.47e-124	436	99
XM_016585781.1	AT5G20620.2	78.769	650	138	0	1	650	390	1039	1.47e-124	436	99
XM_016580190.1	AT5G23860.2	83.221	447	75	0	17	463	540	986	6.24e-117	411	97
XM_016580190.1	AT5G23860.1	83.221	447	75	0	17	463	563	1009	6.24e-117	411	97
XM_016588468.1	AT5G20620.2	83.516	455	75	0	110	564	618	1072	3.25e-121	425	85
XM_016588468.1	AT5G20620.2	82.124	565	101	0	103	667	155	719	5.28e-139	484	85
XM_016588468.1	AT5G20620.1	83.516	455	75	0	110	564	799	1253	3.25e-121	425	84
XM_016588468.1	AT5G20620.1	81.541	558	103	0	110	667	343	900	8.9e-132	460	84
XM_016655946.1	AT5G20620.1	83.644	911	149	0	136	1046	343	1253	0	857	80
XM_016601848.1	AT5G62690.1	81.387	1327	247	0	76	1402	262	1588	0	1083	80
XM_016608384.1	AT5G62690.1	81.161	1327	250	0	97	1423	262	1588	0	1066	80
XM_016635058.1	AT4G05050.3	81.099	455	86	0	100	554	268	722	1.56e-102	364	80
XM_016635058.1	AT4G05050.1	81.099	455	86	0	100	554	372	826	1.56e-102	364	80
XM_016635058.1	AT4G05050.2	81.099	455	86	0	100	554	609	1063	1.56e-102	364	80
XM_016649381.1	AT4G05320.6	78.524	908	195	0	107	1014	276	1183	1.14e-172	597	78
XM_016644254.1	AT5G62690.1	81.654	1330	244	0	123	1452	259	1588	0	1105	77
XM_016625668.1	AT5G62690.1	81.45	1310	243	0	94	1403	262	1571	0	1074	77
XM_016640346.1	AT5G62690.1	81.66	1325	243	0	126	1450	262	1586	0	1101	76
XM_016626109.1	AT5G62690.1	81.811	1325	241	0	147	1471	262	1586	0	1112	75
XM_016655379.1	AT3G04120.1	83.871	992	160	0	107	1098	140	1131	0	946	73
XM_016608036.1	AT5G20620.2	81.514	925	171	0	133	1057	148	1072	0	761	73
XM_016608036.1	AT5G20620.1	81.778	911	166	0	147	1057	343	1253	0	763	72
XM_016608677.1	AT3G04120.1	82.909	983	168	0	134	1116	148	1130	0	885	71
XM_016585781.1	AT5G03240.1	80.659	455	88	0	1	455	699	1153	1.52e-99	353	70
XM_016585781.1	AT5G03240.2	80.659	455	88	0	1	455	856	1310	1.52e-99	353	70
XM_016585781.1	AT5G03240.3	80.659	455	88	0	1	455	874	1328	1.52e-99	353	70
XM_016598695.1	AT5G10360.1	80.801	724	139	0	64	787	109	832	8.11e-164	568	69
XM_016638545.1	AT1G13440.1	81.94	969	175	0	147	1115	406	1374	0	821	68
XM_016601911.1	AT5G10360.1	79.972	724	145	0	77	800	109	832	8.38e-154	534	68
XM_016655379.1	AT1G13440.2	83.771	419	68	0	107	525	158	576	1.47e-112	398	65
XM_016643257.1	AT1G13440.2	84.501	471	73	0	669	1139	582	1052	4.03e-133	466	64
XR_001648122.1	AT3G04120.1	83.532	923	152	0	154	1076	148	1070	0	863	64
XM_016585463.1	AT4G05320.5	83.259	902	151	0	106	1007	81	982	0	830	62
XM_016585463.1	AT4G05320.8	82.262	902	160	0	106	1007	64	965	0	780	62
XM_016585463.1	AT4G05320.6	81.159	897	169	0	111	1007	504	1400	0	721	62
XM_016585463.1	AT4G05320.2	81.159	897	169	0	111	1007	735	1631	0	721	62
XM_016585463.1	AT4G05320.3	81.159	897	169	0	111	1007	517	1413	0	721	62
XM_016585463.1	AT4G05320.4	81.159	897	169	0	111	1007	507	1403	0	721	62
XM_016608035.1	AT5G20620.2	81.229	911	171	0	375	1285	162	1072	0	736	61
XM_016632677.1	AT4G05320.5	82.483	902	158	0	123	1024	81	982	0	791	60
XM_016583246.1	AT1G13440.1	82.043	969	174	0	367	1335	406	1374	0	826	60
XM_016632677.1	AT4G05320.8	81.707	902	165	0	123	1024	64	965	0	752	60
XM_016632677.1	AT4G05320.6	80.713	897	173	0	128	1024	504	1400	0	699	60
XM_016632677.1	AT4G05320.2	80.713	897	173	0	128	1024	735	1631	0	699	60
XM_016632677.1	AT4G05320.3	80.713	897	173	0	128	1024	517	1413	0	699	60
XM_016632677.1	AT4G05320.4	80.713	897	173	0	128	1024	507	1403	0	699	60
XM_016581480.1	AT3G11510.1	80.045	446	89	0	131	576	96	541	8.94e-93	331	55
XM_016655946.1	AT5G20620.2	83.678	919	150	0	128	1046	154	1072	0	867	54
XM_016655946.1	AT4G05320.8	80.377	902	177	0	364	1265	69	970	0	686	53
XM_016621370.1	AT5G20620.1	81.132	212	40	0	226	437	1027	1238	5.64e-44	171	51
XM_016621370.1	AT5G20620.1	79.982	1129	226	0	221	1349	110	1238	0	833	51
XM_016594844.1	AT5G62690.1	81.053	1330	249	1	101	1430	262	1588	0	1057	80
XM_016655946.1	AT4G05320.2	80.16	1376	272	1	131	1506	274	1648	0	1027	80
XM_016655946.1	AT4G05320.4	80.117	1373	272	1	134	1506	49	1420	0	1022	80
XM_016649381.1	AT4G05320.8	79.126	915	190	1	107	1021	69	982	0	630	79
XM_016655946.1	AT4G05320.1	80.402	1143	223	1	364	1506	86	1227	0	869	67
XM_016655946.1	AT4G05320.6	80.052	1143	227	1	364	1506	276	1417	0	846	67
XM_016655946.1	AT4G05320.5	80.109	915	181	1	592	1506	86	999	0	680	54
XM_016585781.1	AT4G02890.3	80.338	651	126	2	1	650	365	1014	3.08e-141	492	99
XM_016585781.1	AT4G02890.4	80.338	651	126	2	1	650	206	855	3.08e-141	492	99
XM_016653382.1	AT4G14960.2	84.476	1327	204	2	116	1441	173	1498	0	1308	81
XM_016655230.1	AT4G14960.2	84.476	1327	204	2	118	1443	173	1498	0	1308	81
XM_016655946.1	AT5G20620.1	82.895	912	154	2	592	1502	115	1025	0	819	80
XM_016655946.1	AT5G20620.1	82.632	1140	196	2	364	1502	115	1253	0	1007	80
XM_016649381.1	AT4G05320.1	79.098	909	188	2	107	1014	86	993	0	625	78
XM_016655230.1	AT4G14960.1	84.609	1163	177	2	118	1279	108	1269	0	1155	71
XM_016653382.1	AT4G14960.1	84.265	1163	181	2	116	1277	108	1269	0	1133	71
XM_016643257.1	AT1G13440.1	83.776	980	157	2	161	1139	389	1367	0	928	71
XM_016649898.1	AT4G14960.1	83.663	1163	188	2	112	1273	108	1269	0	1094	71
XM_016643257.1	AT3G04120.1	83.585	993	161	2	161	1152	140	1131	0	929	71
XM_016599337.1	AT5G10360.1	80.305	721	140	2	88	807	113	832	1.33e-156	544	70
XM_016638608.1	AT5G10360.1	80.305	721	140	2	103	822	113	832	1.38e-156	544	68
XR_001648122.1	AT1G13440.1	82.529	933	161	2	163	1094	406	1337	0	819	65
XM_016585781.1	AT4G02890.2	81.324	423	77	2	229	650	71	492	3.29e-96	342	65
XM_016585781.1	AT4G02890.1	80.851	423	79	2	229	650	68	489	7.12e-93	331	65
XM_016643257.1	AT1G13440.2	84.048	420	65	2	161	579	158	576	3.21e-114	403	64
XM_016642653.1	AT5G20620.2	84.327	453	69	2	150	601	618	1069	7.14e-126	442	62
XM_016642653.1	AT5G20620.1	84.327	453	69	2	150	601	799	1250	7.14e-126	442	62
XM_016642653.1	AT5G20620.2	82.018	684	121	2	150	832	390	1072	1.45e-167	580	62
XM_016642653.1	AT5G20620.1	82.018	684	121	2	150	832	571	1253	1.45e-167	580	62
XM_016585463.1	AT4G05320.1	81.96	898	160	2	111	1007	314	1210	0	760	62
XM_016656021.1	AT2G34480.2	82.453	530	91	2	113	641	264	792	3.21e-132	462	61
XM_016656021.1	AT2G34480.1	82.453	530	91	2	113	641	94	622	3.21e-132	462	61
XM_016648058.1	AT3G14600.1	80.651	522	99	2	113	633	160	680	1.97e-114	403	61
XM_016597143.1	AT4G05320.8	80.464	906	175	2	125	1029	64	968	0	691	61
XM_016632677.1	AT4G05320.1	81.514	898	164	2	128	1024	314	1210	0	737	60
XM_016595529.1	AT3G14600.1	80.924	498	93	2	75	571	160	656	4.09e-111	392	60
XM_016623557.1	AT3G14600.1	80.843	522	98	2	113	633	160	680	4.36e-116	409	59
XM_016656021.1	AT3G14600.1	81.727	498	89	2	113	609	160	656	9.12e-118	414	58
XM_016649381.1	AT4G05050.3	79.762	672	134	2	107	777	40	710	2.57e-139	486	58
XM_016649381.1	AT4G05050.1	79.762	672	134	2	107	777	144	814	2.57e-139	486	58
XM_016649381.1	AT4G05050.2	79.762	672	134	2	107	777	381	1051	2.57e-139	486	58
XM_016655946.1	AT4G02890.3	80.379	897	174	2	364	1259	365	1260	0	680	52
XM_016655946.1	AT4G02890.4	80.379	897	174	2	364	1259	206	1101	0	680	52
XM_016655946.1	AT4G05320.3	80.044	1373	271	3	135	1506	60	1430	0	1014	80
XM_016605691.1	AT5G23860.2	81.825	1337	240	3	118	1451	81	1417	0	1120	79
XM_016605691.1	AT5G23860.1	81.825	1337	240	3	118	1451	104	1440	0	1120	79
XM_016649381.1	AT4G05320.5	80.022	916	180	3	107	1021	86	999	0	675	79
XM_016649381.1	AT4G02890.3	79.913	916	181	3	107	1021	365	1278	0	669	79
XM_016649381.1	AT4G02890.4	79.913	916	181	3	107	1021	206	1119	0	669	79
XM_016644254.1	AT5G23860.2	81.737	1336	241	3	124	1456	82	1417	0	1112	78
XM_016644254.1	AT5G23860.1	81.737	1336	241	3	124	1456	105	1440	0	1112	78
XM_016597143.1	AT4G05320.6	79.721	1149	230	3	125	1272	271	1417	0	828	77
XM_016597143.1	AT4G05320.2	79.72	1144	229	3	130	1272	507	1648	0	824	77
XM_016597143.1	AT4G05320.3	79.72	1144	229	3	130	1272	289	1430	0	824	77
XM_016597143.1	AT4G05320.4	79.72	1144	229	3	130	1272	279	1420	0	824	77
XM_016604281.1	AT5G23860.2	82.553	1324	226	3	84	1403	83	1405	0	1160	75
XM_016604281.1	AT5G23860.1	82.553	1324	226	3	84	1403	106	1428	0	1160	75
XM_016638545.1	AT3G04120.1	81.421	985	179	3	138	1120	148	1130	0	802	69
XM_016583246.1	AT3G04120.1	81.218	985	181	3	358	1340	148	1130	0	791	61
XM_016590787.1	AT3G11510.1	80.58	448	83	3	128	573	96	541	4.14e-96	342	55
XM_016649898.1	AT4G14960.2	83.494	1351	218	4	112	1461	173	1519	0	1254	83
XM_016649898.1	AT1G50010.1	83.493	1357	219	4	112	1467	148	1500	0	1260	83
XM_016655230.1	AT1G50010.1	83.444	1359	220	4	118	1475	148	1502	0	1258	83
XM_016653382.1	AT1G50010.1	83.297	1359	222	4	116	1473	148	1502	0	1247	83
XM_016635058.1	AT4G05050.3	80.316	696	133	4	554	1247	38	731	2.44e-150	523	80
XM_016635058.1	AT4G05050.1	80.288	695	133	4	555	1247	143	835	8.76e-150	521	80
XM_016635058.1	AT4G05050.2	80.288	695	133	4	555	1247	380	1072	8.76e-150	521	80
XM_016625668.1	AT5G23860.2	80.889	1350	252	4	92	1436	81	1429	0	1059	79
XM_016625668.1	AT5G23860.1	80.889	1350	252	4	92	1436	104	1452	0	1059	79
XM_016649381.1	AT4G05320.2	78.571	910	191	4	107	1014	279	1186	1.14e-172	597	78
XM_016649381.1	AT4G05320.4	78.571	910	191	4	107	1014	51	958	1.14e-172	597	78
XM_016613081.1	AT1G20010.1	81.894	1320	233	4	152	1471	351	1664	0	1109	77
XM_016608035.1	AT5G20620.1	81.126	1155	214	4	133	1285	101	1253	0	922	77
XM_016655379.1	AT1G13440.1	83.588	981	157	4	107	1085	389	1367	0	917	72
XM_016602781.1	AT4G14960.1	83.763	1164	185	4	112	1273	108	1269	0	1099	69
XM_016645046.1	AT2G34480.2	83.704	540	84	4	96	633	246	783	1.35e-145	507	68
XM_016645046.1	AT2G34480.1	83.704	540	84	4	96	633	76	613	1.35e-145	507	68
XM_016595529.1	AT2G34480.2	81.588	554	98	4	57	608	246	797	5.15e-130	455	67
XM_016595529.1	AT2G34480.1	81.588	554	98	4	57	608	76	627	5.15e-130	455	67
XM_016655379.1	AT1G13440.2	84.355	473	70	4	615	1085	582	1052	1.84e-131	460	65
XM_016648058.1	AT2G34480.2	83.026	542	88	4	95	634	246	785	5.29e-140	488	63
XM_016648058.1	AT2G34480.1	83.026	542	88	4	95	634	76	615	5.29e-140	488	63
XM_016642653.1	AT5G20620.2	81.319	910	166	4	142	1049	154	1061	0	736	62
XM_016623557.1	AT2G34480.2	82.472	542	91	4	95	634	246	785	5.48e-135	472	61
XM_016623557.1	AT2G34480.1	82.472	542	91	4	95	634	76	615	5.48e-135	472	61
XM_016649381.1	AT4G05320.3	78.524	908	190	5	110	1014	63	968	5.3e-171	592	78
XM_016641389.1	AT5G62690.1	81.236	1295	231	5	144	1437	276	1559	0	1035	77
XM_016641389.1	AT5G62700.1	81.158	1295	232	5	144	1437	255	1538	0	1029	77
XM_016657948.1	AT1G08360.1	82.299	548	91	5	193	737	234	778	2.08e-134	470	59
XM_016658207.1	AT4G14960.2	80.455	1320	252	6	44	1360	173	1489	0	1003	83
XM_016619921.1	AT4G14960.2	84.418	1322	200	6	96	1414	172	1490	0	1295	82
XM_016619921.1	AT1G50010.1	83.737	1322	209	6	96	1414	147	1465	0	1245	82
XM_016602781.1	AT4G14960.2	83.676	1360	215	6	112	1469	173	1527	0	1275	81
XM_016602781.1	AT1G50010.1	83.603	1360	216	6	112	1469	148	1502	0	1269	81
XM_016600611.1	AT5G62690.1	77.34	1293	285	6	59	1347	262	1550	0	758	80
XM_016641389.1	AT1G20010.1	81.908	1321	231	6	133	1452	351	1664	0	1109	78
XM_016608384.1	AT5G44340.1	79.66	1293	255	6	94	1382	151	1439	0	924	78
XM_016658207.1	AT4G14960.1	80.515	1165	221	6	44	1205	108	1269	0	889	73
XM_016619921.1	AT4G14960.1	84.477	1166	175	6	96	1258	107	1269	0	1146	72
XM_016642653.1	AT5G20620.1	81.285	903	163	6	150	1049	343	1242	0	726	62
XM_016651865.1	AT3G14600.1	80.439	501	92	6	100	597	159	656	1.11e-106	377	62
XM_016608764.1	AT3G14600.1	81.038	501	89	6	100	597	159	656	1.13e-111	394	61
XM_016647345.1	AT2G34480.2	83.607	549	84	6	90	634	239	785	1.41e-146	510	51
XM_016647345.1	AT2G34480.1	83.607	549	84	6	90	634	69	615	1.41e-146	510	51
XM_016594844.1	AT5G23860.2	80.741	1350	251	7	99	1440	81	1429	0	1044	80
XM_016594844.1	AT5G23860.1	80.741	1350	251	7	99	1440	104	1452	0	1044	80
XM_016594844.1	AT5G44340.1	80.541	1331	250	7	101	1428	154	1478	0	1014	79
XM_016625668.1	AT5G44340.1	80.18	1332	255	7	94	1422	154	1479	0	989	78
XM_016645363.1	AT5G17330.1	80.721	1276	238	7	132	1403	253	1524	0	987	71
XM_016612181.1	AT1G08360.1	83.06	549	85	7	192	736	234	778	4.58e-141	492	57
XM_016601848.1	AT5G44340.1	79.354	1332	264	8	73	1400	151	1475	0	926	80
XM_016641389.1	AT5G23860.2	81.042	1324	239	8	131	1452	83	1396	0	1044	78
XM_016641389.1	AT5G23860.1	81.042	1324	239	8	131	1452	106	1419	0	1044	78
XM_016613081.1	AT5G23860.2	80.816	1324	242	8	150	1471	83	1396	0	1027	77
XM_016613081.1	AT5G23860.1	80.816	1324	242	8	150	1471	106	1419	0	1027	77
XM_016613081.1	AT5G62690.1	80.74	1298	232	8	163	1456	276	1559	0	996	76
XM_016622424.1	AT1G43170.5	80.295	1152	219	8	84	1231	146	1293	0	863	76
XM_016622424.1	AT1G43170.7	80.331	1149	218	8	87	1231	158	1302	0	863	75
XM_016622424.1	AT1G43170.8	80.331	1149	218	8	87	1231	161	1305	0	863	75
XM_016622424.1	AT1G43170.9	80.331	1149	218	8	87	1231	155	1299	0	863	75
XM_016622424.1	AT1G43170.3	80.331	1149	218	8	87	1231	33	1177	0	863	75
XM_016622424.1	AT1G43170.2	80.331	1149	218	8	87	1231	35	1179	0	863	75
XM_016622424.1	AT1G43170.6	80.331	1149	218	8	87	1231	152	1296	0	863	75
XM_016622424.1	AT1G43170.1	80.331	1149	218	8	87	1231	249	1393	0	863	75
XM_016622424.1	AT1G43170.4	79.724	942	183	8	294	1231	66	1003	0	675	62
XM_016588195.1	AT1G08360.1	81.091	550	96	8	182	727	234	779	2.77e-123	433	58

## Sheet: Table 1.4
Table 1.4: Homologous gene pairs fromNicotiana tabaccum(Tobacco) and AtFusionDB
Tobacco acc. IDs	AtFusionDB IDs
XM_016580190	AT5G23860
XM_016585463	AT4G05320
XM_016585781	AT4G02890
XM_016585781	AT5G03240
XM_016585781	AT5G20620
XM_016588468	AT5G20620
XM_016594844	AT5G23860
XM_016595529	AT2G34480
XM_016597143	AT4G05320
XM_016602781	AT4G14960
XM_016604281	AT5G23860
XM_016605691	AT5G23860
XM_016608035	AT5G20620
XM_016608036	AT5G20620
XM_016613081	AT5G23860
XM_016619921	AT4G14960
XM_016621370	AT5G20620
XM_016622424	AT1G43170
XM_016623557	AT2G34480
XM_016625668	AT5G23860
XM_016632677	AT4G05320
XM_016635058	AT4G05050
XM_016641389	AT5G23860
XM_016642653	AT5G20620
XM_016643257	AT1G13440
XM_016644254	AT5G23860
XM_016645046	AT2G34480
XM_016647345	AT2G34480
XM_016648058	AT2G34480
XM_016649381	AT4G02890
XM_016649381	AT4G05050
XM_016649381	AT4G05320
XM_016649898	AT4G14960
XM_016653382	AT4G14960
XM_016655230	AT4G14960
XM_016655379	AT1G13440
XM_016655946	AT4G02890
XM_016655946	AT4G05320
XM_016655946	AT5G20620
XM_016656021	AT2G34480
XM_016658207	AT4G14960

## Sheet: Table 1.5
Table 1.5: Homologous genes from Rice, Tobacco, and Arabidopsis
Accesion	Entry	Entry name	Protein name	Gene name	Plant	Length				Accesion	Entry	Entry name	Protein name	Gene name	Plant	Length
AK061522	Q6ZJ04	Q6ZJ04_ORYSJ	Ribosomal protein	OJ1150_A11.31	Oryza sativa subsp. japonica (Rice)	216				AT5G23860	P29516	TBB8_ARATH	Tubulin beta-8 chain	TUBB8 TUB8, At5g23860, MRO11.10	Arabidopsis thaliana (Mouse-ear cress)	449
AK071249	Q5QL84	Q5QL84_ORYSJ	Ribosomal protein	P0562A06.10-2	Oryza sativa subsp. japonica (Rice)	133				AT4G05320	Q3EAA5	Q3EAA5_ARATH	AT4g05320/C17L7_240	UBQ10 polyubiquitin 10, UBI10, ubiquitin 10, At4g05320, C17L7.240	Arabidopsis thaliana (Mouse-ear cress)	381
AK099086	Q6K5G8	G3PC3_ORYSJ	Glyceraldehyde-3-phosphate dehydrog...	GAPC3 GAPDH, Os02g0601300, LOC_Os02g38920, OJ1791_B03.34, OsJ_07411	Oryza sativa subsp. japonica (Rice)	337				AT4G05320	Q8H159	UBQ10_ARATH	Polyubiquitin 10	UBQ10 At4g05320, C17L7.240	Arabidopsis thaliana (Mouse-ear cress)	457
AK122127	Q43594	TBB1_ORYSJ	Tubulin beta-1 chain	TUBB1 OSTB-34, TUB1, Os01g0282800, LOC_Os01g18050, OSJNBa0004B13.5	Oryza sativa subsp. japonica (Rice)	447				AT4G02890	Q3E7T8	UBQ14_ARATH	Polyubiquitin 14	UBQ14 At4g02890, T5J8.21	Arabidopsis thaliana (Mouse-ear cress)	305
AK073392	Q53JG0	Q53JG0_ORYSJ	60S ribosomal protein L3, putative,...	RPL3B LOC_Os11g06750, Os11g0168200, OsJ_33102, OSNPB_110168200	Oryza sativa subsp. japonica (Rice)	389				AT5G03240	Q1EC66	UBQ3_ARATH	Polyubiquitin 3	UBQ3 At5g03240, F15A17_270, MOK16.15	Arabidopsis thaliana (Mouse-ear cress)	306
AK102194	Q10DN0	Q10DN0_ORYSJ	Tubulin alpha chain	LOC_Os03g51600	Oryza sativa subsp. japonica (Rice)	416				AT5G20620	P0CH32	UBQ4_ARATH	Polyubiquitin 4	UBQ4 At5g20620, T1M15.20	Arabidopsis thaliana (Mouse-ear cress)	382
AK119234	P35683	IF4A1_ORYSJ	Eukaryotic initiation factor 4A-1	Os06g0701100, LOC_Os06g48750, OsJ_22532, P0468G03.33, P0596H10.2	Oryza sativa subsp. japonica (Rice)	414				AT2G34480	P51418	R18A2_ARATH	60S ribosomal protein L18a-2	RPL18AB At2g34480, T31E10.18	Arabidopsis thaliana (Mouse-ear cress)	178
AK102673	Q6AUF5	Q6AUF5_ORYSJ	60S ribosomal protein L18a	Os05g0565000 Os05g0565000, OsJ_19561, OSJNBb0053D02.16, OSNPB_050565000	Oryza sativa subsp. japonica (Rice)	178				AT4G14960	B9DFF8	B9DFF8_ARATH	Tubulin alpha chain	TUA6 Tubulin alpha-6, At4g14960	Arabidopsis thaliana (Mouse-ear cress)	427
AK121755	Q943F3	RL18A_ORYSJ	60S ribosomal protein L18a	RPL18A Os01g0752300, LOC_Os01g54870, OsJ_03475, P0046E05.38, P0435B05.19	Oryza sativa subsp. japonica (Rice)	178				AT4G14960	P29511	TBA6_ARATH	Tubulin alpha-6 chain	TUBA6 TUA6, At4g14960, dl3520c	Arabidopsis thaliana (Mouse-ear cress)	450
AK121204	P35685	RL7A1_ORYSJ	60S ribosomal protein L7a-1	RPL7A-1 Os08g0326400, LOC_Os08g23710, OJ1136_A10.108, P0703C03.43	Oryza sativa subsp. japonica (Rice)	258				AT1G43170	A8MQQ1	A8MQQ1_ARATH	Ribosomal protein 1	RP1 ARP1, emb2207, embryo defective 2207, ribosomal protein 1, RPL3A	Arabidopsis thaliana (Mouse-ear cress)	306
AK101459	Q7XSA6	Q7XSA6_ORYSJ	40S ribosomal protein S14	Os02g0534800, Os04g0413600, B1136H02.20, OJ000126_13.9, OJ1112_G07.7	Oryza sativa subsp. japonica (Rice)	151				AT1G43170	P17094	RL31_ARATH	60S ribosomal protein L3-1	ARP1 EMB2207, RPL3A, At1g43170, F1I21.1	Arabidopsis thaliana (Mouse-ear cress)	389
AK101547	Q6H7T6	Q6H7T6_ORYSJ	Os02g0161900 protein	Os02g0161900, Os06g0681400, OJ9003_G05.28, OsJ_05481	Oryza sativa subsp. japonica (Rice)	457				AT4G05050	F4JGM3	F4JGM3_ARATH	Polyubiquitin	UBQ11 polyubiquitin 10, UBI10, ubiquitin 10, ubiquitin 11, UBQ10	Arabidopsis thaliana (Mouse-ear cress)	153
AK121621	Q75LR5	Q75LR5_ORYSJ	40S ribosomal protein S6	LOC_Os03g27260, Os03g0390000, OsJ_11113, OSJNBa0017N12.10, OSNPB_030390000	Oryza sativa subsp. japonica (Rice)	245				AT4G05050	P0CH33	UBQ11_ARATH	Polyubiquitin 11	UBQ11 At4g05050, C17L7.6, T32N4.13	Arabidopsis thaliana (Mouse-ear cress)	229
AK069237	Q40665	TBB3_ORYSJ	Tubulin beta-3 chain	TUBB3 RTUB-2, TUB3, Os06g0671900, LOC_Os06g46000, OsJ_22330	Oryza sativa subsp. japonica (Rice)	446				AT1G13440	F4HQT1	F4HQT1_ARATH	Glyceraldehyde-3-phosphate dehydrog...	GAPC2 GAPC-2, At1g13440, T6J4.17, T6J4_17	Arabidopsis thaliana (Mouse-ear cress)	310
AK061826	Q5ZBX1	Q5ZBX1_ORYSJ	40S ribosomal protein S4	Os01g0358400 Os01g0358400, OsJ_01737, OSNPB_010358400, P0514H03.14	Oryza sativa subsp. japonica (Rice)	265				AT1G13440	Q9FX54	G3PC2_ARATH	Glyceraldehyde-3-phosphate dehydrog...	GAPC2 GAPDH, At1g13440, T6J4.17	Arabidopsis thaliana (Mouse-ear cress)	338
AK102423	Q0E4Q0	Q0E4Q0_ORYSJ	40S ribosomal protein S4	RPS4 Os02g0105900, OsJ_05027	Oryza sativa subsp. japonica (Rice)	265
Accesion	Entry	Entry name	Protein name	Gene name	Plant	Length
XM_016580190	A0A1S3X734	A0A1S3X734_TOBAC	tubulin beta-1 chain-like	LOC107761895	Nicotiana tabacum (Common tobacco)	154
XM_016585781	A0A1S3XNP1	A0A1S3XNP1_TOBAC	polyubiquitin 11-like	LOC107766892	Nicotiana tabacum (Common tobacco)	192
XM_016588468	A0A1S3XVQ1	A0A1S3XVQ1_TOBAC	polyubiquitin 11	LOC107769260	Nicotiana tabacum (Common tobacco)	186
XM_016594844	A0A1S3YDP0	A0A1S3YDP0_TOBAC	Tubulin beta chain	LOC107775153	Nicotiana tabacum (Common tobacco)	446
XM_016597143	A0A1S3YK64	A0A1S3YK64_TOBAC	polyubiquitin-like	LOC107777155	Nicotiana tabacum (Common tobacco)	381
XM_016604281	A0A1S3Z6C2	A0A1S3Z6C2_TOBAC	Tubulin beta chain	LOC107783308	Nicotiana tabacum (Common tobacco)	447
XM_016605691	A0A1S3ZAC9	A0A1S3ZAC9_TOBAC	Tubulin beta chain	LOC107784542	Nicotiana tabacum (Common tobacco)	447
XM_016608035	A0A1S3ZGV5	A0A1S3ZGV5_TOBAC	polyubiquitin isoform X1	LOC107786552	Nicotiana tabacum (Common tobacco)	382
XM_016608036	A0A1S3ZGZ1	A0A1S3ZGZ1_TOBAC	polyubiquitin isoform X2	LOC107786552	Nicotiana tabacum (Common tobacco)	306
XM_016619921	A0A1S4AFG1	A0A1S4AFG1_TOBAC	Tubulin alpha chain	LOC107797065	Nicotiana tabacum (Common tobacco)	450
XM_016621370	A0A1S4AJN0	A0A1S4AJN0_TOBAC	polyubiquitin-like	LOC107798392	Nicotiana tabacum (Common tobacco)	609
XM_016622424	A0A1S4B1N5	A0A1S4B1N5_TOBAC	60S ribosomal protein L3-like	LOC107803515 LOC107799324	Nicotiana tabacum (Common tobacco)	389
XM_016623557	A0A1S4ARC3	A0A1S4ARC3_TOBAC	60S ribosomal protein L18a	LOC107800392	Nicotiana tabacum (Common tobacco)	178
XM_016625668	A0A1S4AWT9	A0A1S4AWT9_TOBAC	Tubulin beta chain	LOC107802214	Nicotiana tabacum (Common tobacco)	447
XM_016585463, XM_016632677, XM_016635058	A0A1S4BNW3	A0A1S4BNW3_TOBAC	polyubiquitin	LOC107810300 LOC107766655, LOC107782949, LOC107808184	Nicotiana tabacum (Common tobacco)	381
XM_016613081, XM_016641389	A0A0S0N610	A0A0S0N610_TOBAC	Tubulin beta chain	TUB1 LOC107791087, LOC107815756	Nicotiana tabacum (Common tobacco)	450
XM_016642653	A0A1S4CB03	A0A1S4CB03_TOBAC	polyubiquitin 4-like	LOC107816905	Nicotiana tabacum (Common tobacco)	382
XM_016644254	A0A1S4CEZ1	A0A1S4CEZ1_TOBAC	Tubulin beta chain	LOC107818269	Nicotiana tabacum (Common tobacco)	447
XM_016595529, XM_016645046, XM_016647345, XM_016648058	A0A1S4CP52	A0A1S4CP52_TOBAC	60S ribosomal protein L18a	LOC107820975 LOC107775758, LOC107818966, LOC107821623	Nicotiana tabacum (Common tobacco)	178
XM_016649381	A0A1S4CUF7	A0A1S4CUF7_TOBAC	polyubiquitin	LOC107822786	Nicotiana tabacum (Common tobacco)	305
XM_016602781, XM_016649898	Q8VXD0	Q8VXD0_TOBAC	Tubulin alpha chain	tubA2 LOC107781962, LOC107823267	Nicotiana tabacum (Common tobacco)	451
XM_016653382, XM_016655230	Q8VXC9	Q8VXC9_TOBAC	Tubulin alpha chain	tubA3 LOC107826406, LOC107827984	Nicotiana tabacum (Common tobacco)	451
XM_016643257, XM_016655379	A0A1S4DBQ6	A0A1S4DBQ6_TOBAC	Glyceraldehyde-3-phosphate dehydrog...	LOC107828122 LOC107817426	Nicotiana tabacum (Common tobacco)	340
XM_016655946	A0A1S4DDB5	A0A1S4DDB5_TOBAC	polyubiquitin	LOC107828598	Nicotiana tabacum (Common tobacco)	457
XM_016656021	A0A1S4DDK3	A0A1S4DDK3_TOBAC	60S ribosomal protein L18a	LOC107828661	Nicotiana tabacum (Common tobacco)	178
XM_016658207	A0A1S4DJZ2	A0A1S4DJZ2_TOBAC	Tubulin alpha chain	LOC107830587	Nicotiana tabacum (Common tobacco)	451
